# Supplementary material for: Paleocene-Eocene age glendonites from the Norwegian Margin – Indicators of cold snaps in the hothouse?
Source: Copernicus journal article supplement (doi:10.5194/egusphere-2023-1651), 2023-08-03
Supplement: Supplementary file 1 [file egusphere-2023-1651-supplement.pdf]

## Supplementary Figures

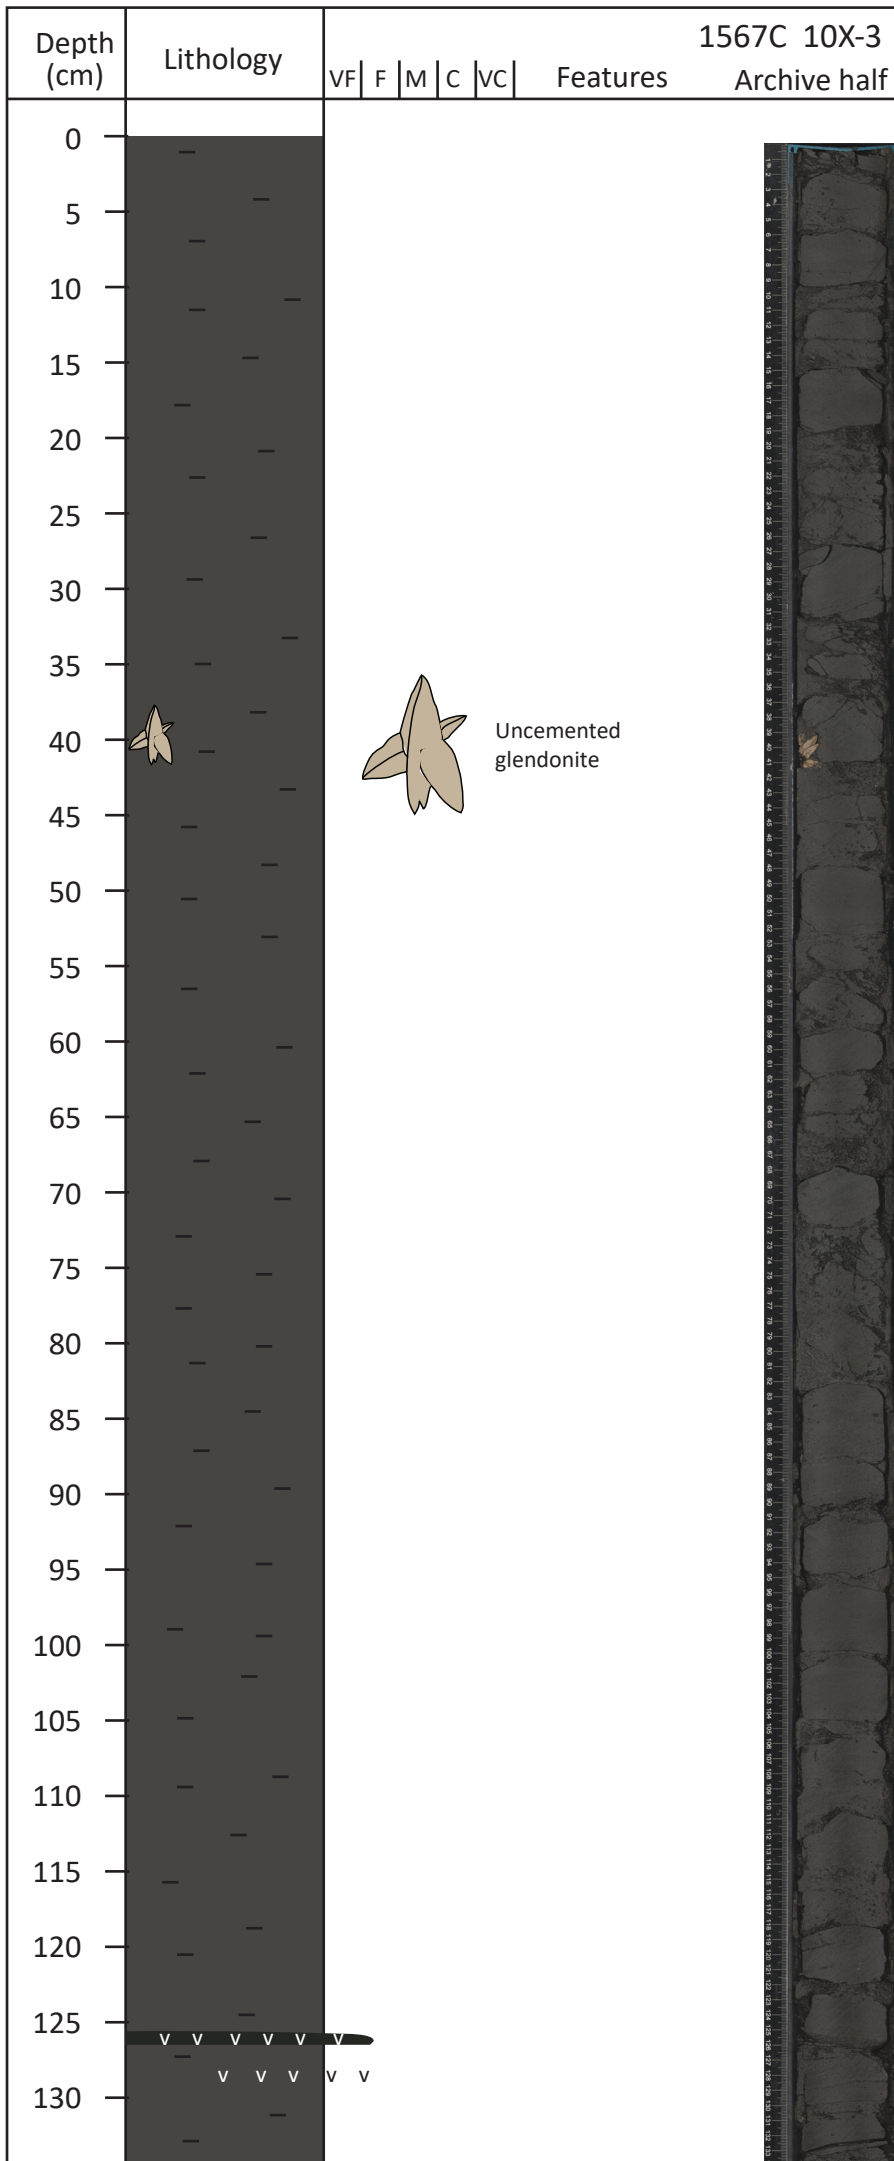

**Supplementary Figure S1:** High-resolution log of core section U1567C-10X-3.

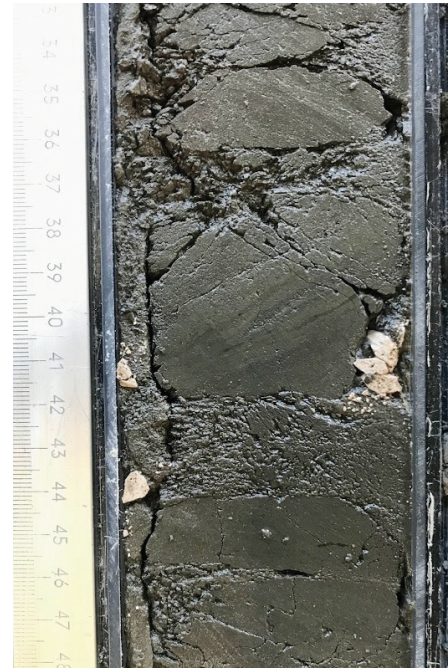

**KEY**

-  Glendonite
- v v v Volcanic ash
- . . . . Sand-sized ash grains
- - - Mud/clay
-  Carbonate
-  Laminations
-  Sub-laminations
-  Bioturbation
-  "Water escape structures" /stress cracks

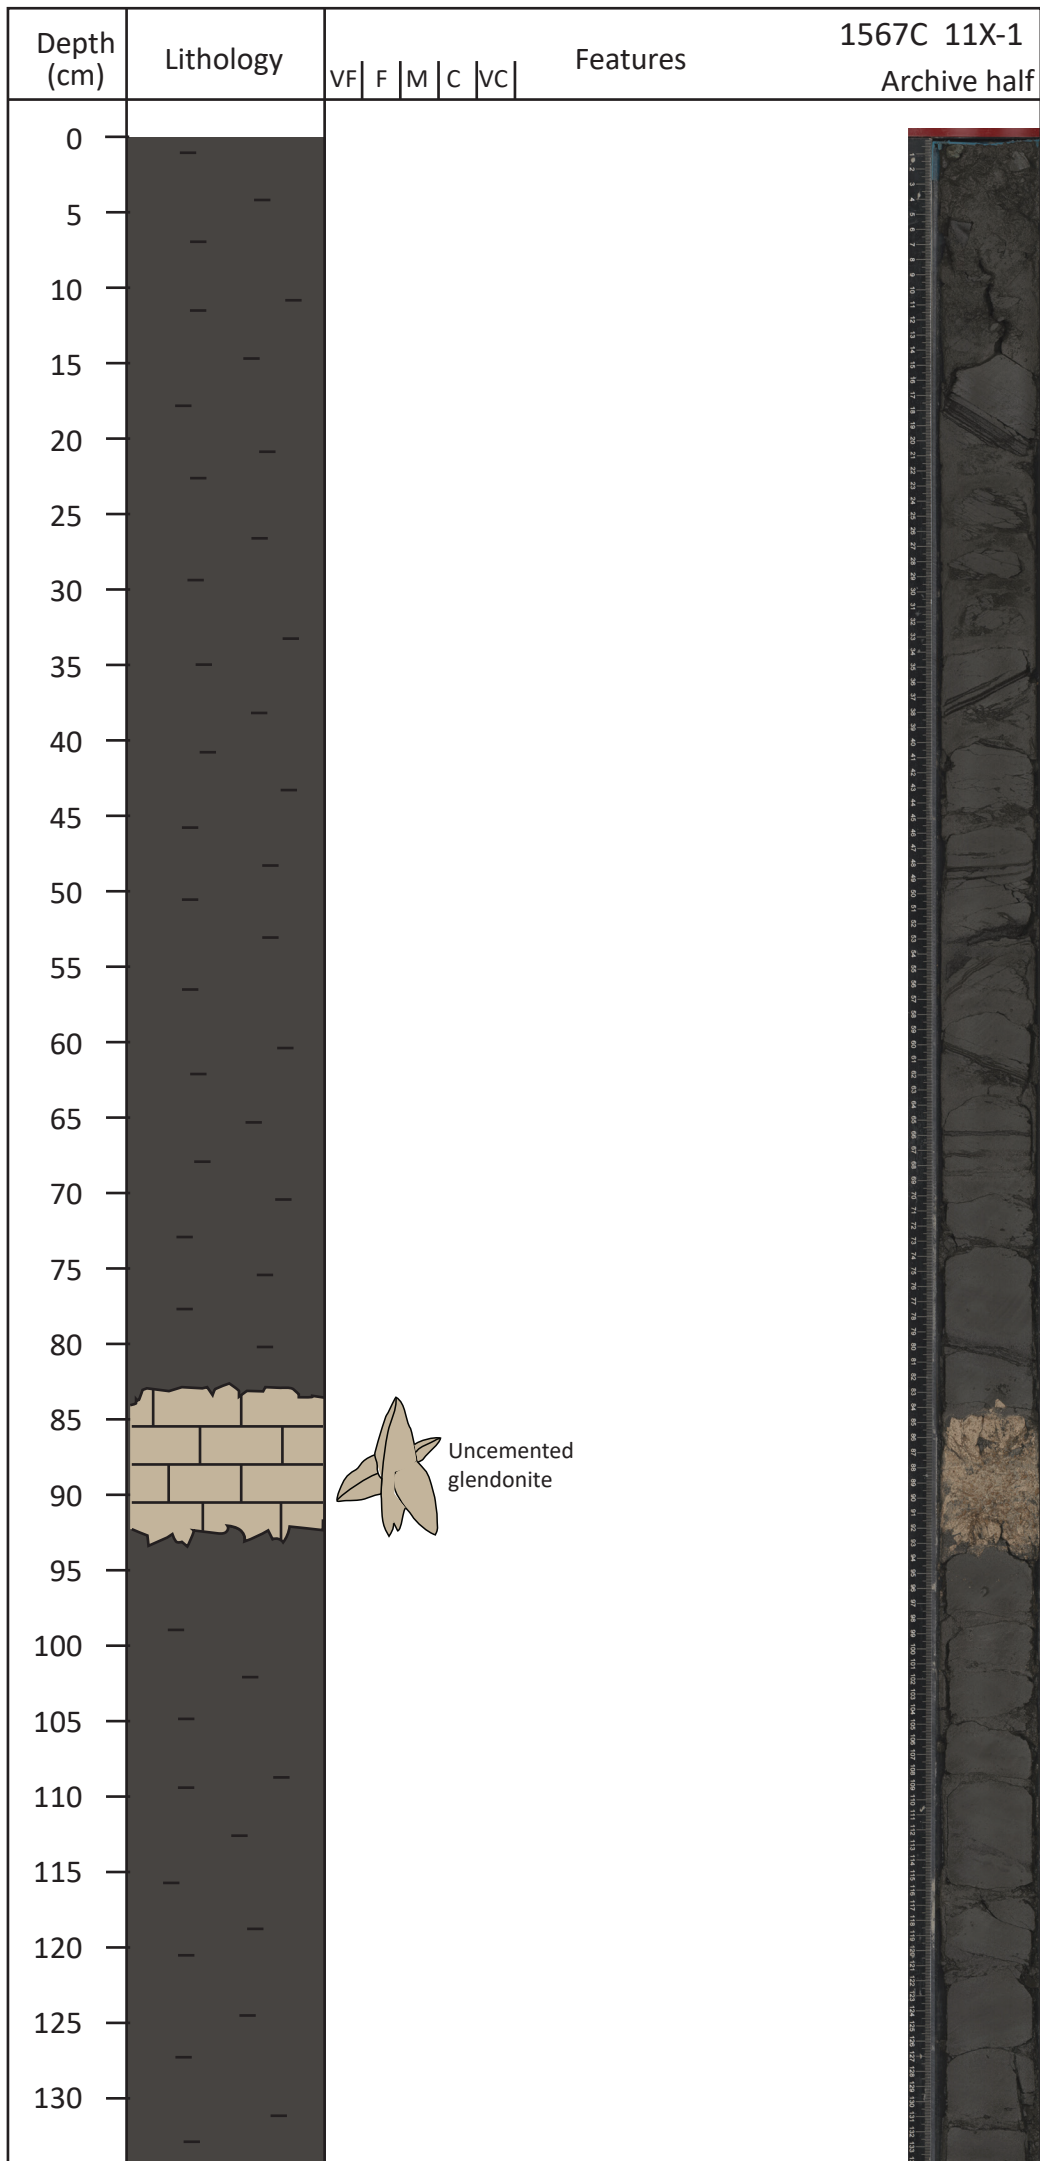

1567C 11X-1  
Archive half

**Supplementary Figure S2:** High-resolution log of core section U1567C-11X-1.

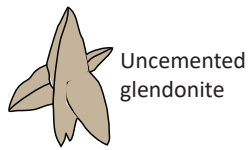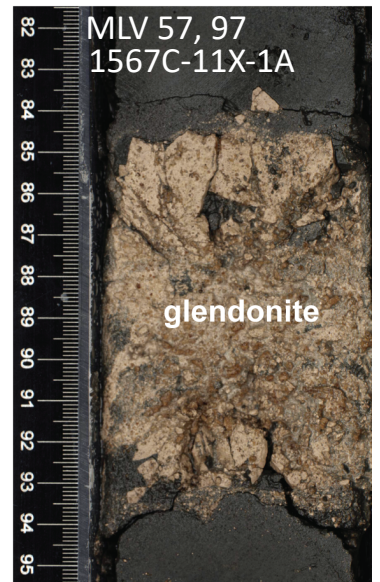

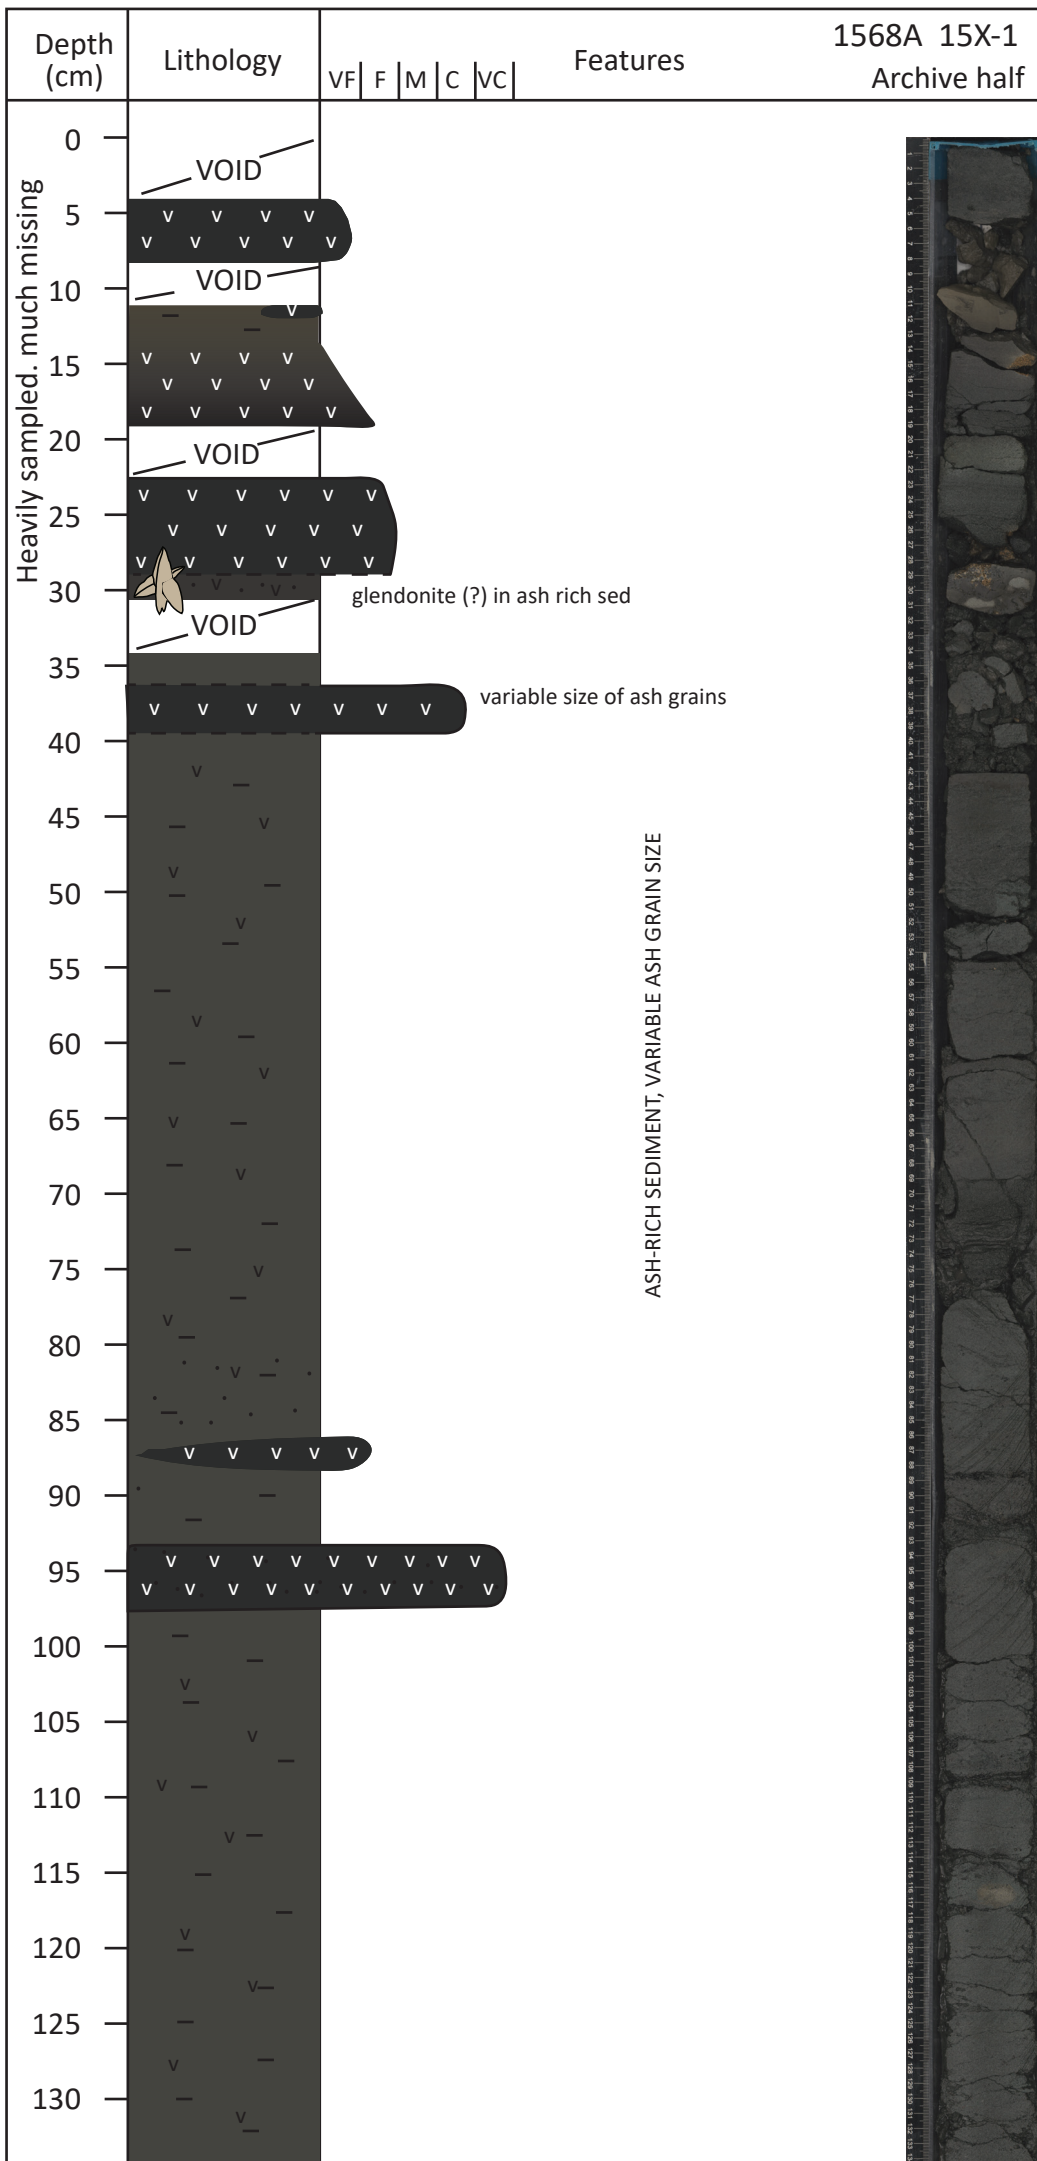

**Supplementary Figure S3:** High-resolution log of core section U1568A-15X-1.

| Depth (cm) | Lithology | 1568A 15X-4 |   |   |   |    | Features                               | 1568A 15X-4<br>Archive half |
|------------|-----------|-------------|---|---|---|----|----------------------------------------|-----------------------------|
|            |           | VF          | F | M | C | VC |                                        |                             |
| 0          | VOID      |             |   |   |   |    |                                        |                             |
| 5          |           |             |   |   |   |    |                                        |                             |
| 10         | VOID      |             |   |   |   |    |                                        |                             |
| 15         |           | v           | v | v | v | v  |                                        |                             |
| 20         |           |             |   |   |   |    |                                        |                             |
| 25         |           |             |   |   |   |    |                                        |                             |
| 30         |           |             |   |   |   |    |                                        |                             |
| 35         |           |             |   |   |   |    |                                        |                             |
| 40         |           |             |   |   |   |    |                                        |                             |
| 45         |           |             |   |   |   |    |                                        |                             |
| 50         |           |             |   |   |   |    |                                        |                             |
| 55         |           |             |   |   |   |    |                                        |                             |
| 60         |           |             |   |   |   |    |                                        |                             |
| 65         |           |             |   |   |   |    |                                        |                             |
| 70         |           |             |   |   |   |    | Lenses of brown mud,<br>streaks of ash |                             |
| 75         |           |             |   |   |   |    | Ash sand in mud                        |                             |
| 80         |           |             |   |   |   |    |                                        |                             |
| 85         |           |             |   |   |   |    |                                        |                             |
| 90         |           |             |   |   |   |    |                                        |                             |
| 95         |           |             |   |   |   |    |                                        |                             |
| 100        |           |             |   |   |   |    |                                        |                             |
| 105        |           |             |   |   |   |    |                                        |                             |
| 110        |           |             |   |   |   |    |                                        |                             |
| 115        |           |             |   |   |   |    |                                        |                             |
| 120        |           |             |   |   |   |    |                                        |                             |
| 125        |           |             |   |   |   |    |                                        |                             |
| 130        |           |             |   |   |   |    |                                        |                             |

**Supplementary Figure S4:** High-resolution log of core section U1568A-15X-4.

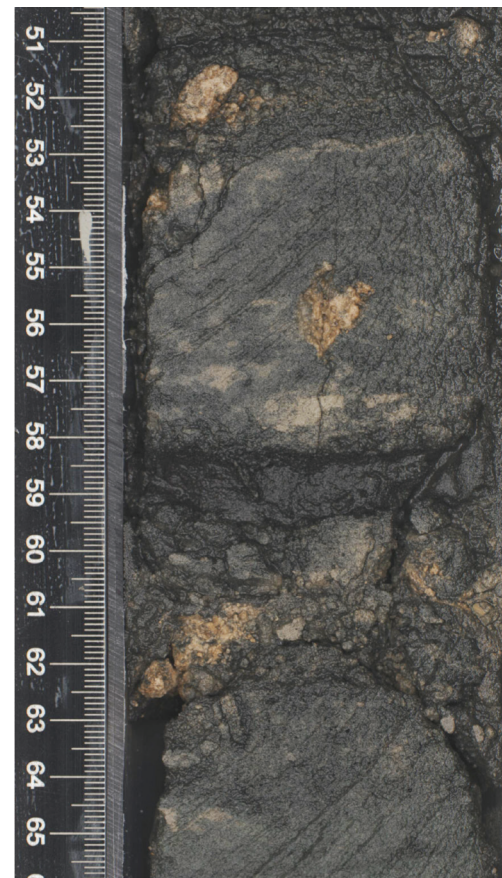

coarser ash-sand in mud  
uncemented glendonites  
crumbled into the ash-mud mix

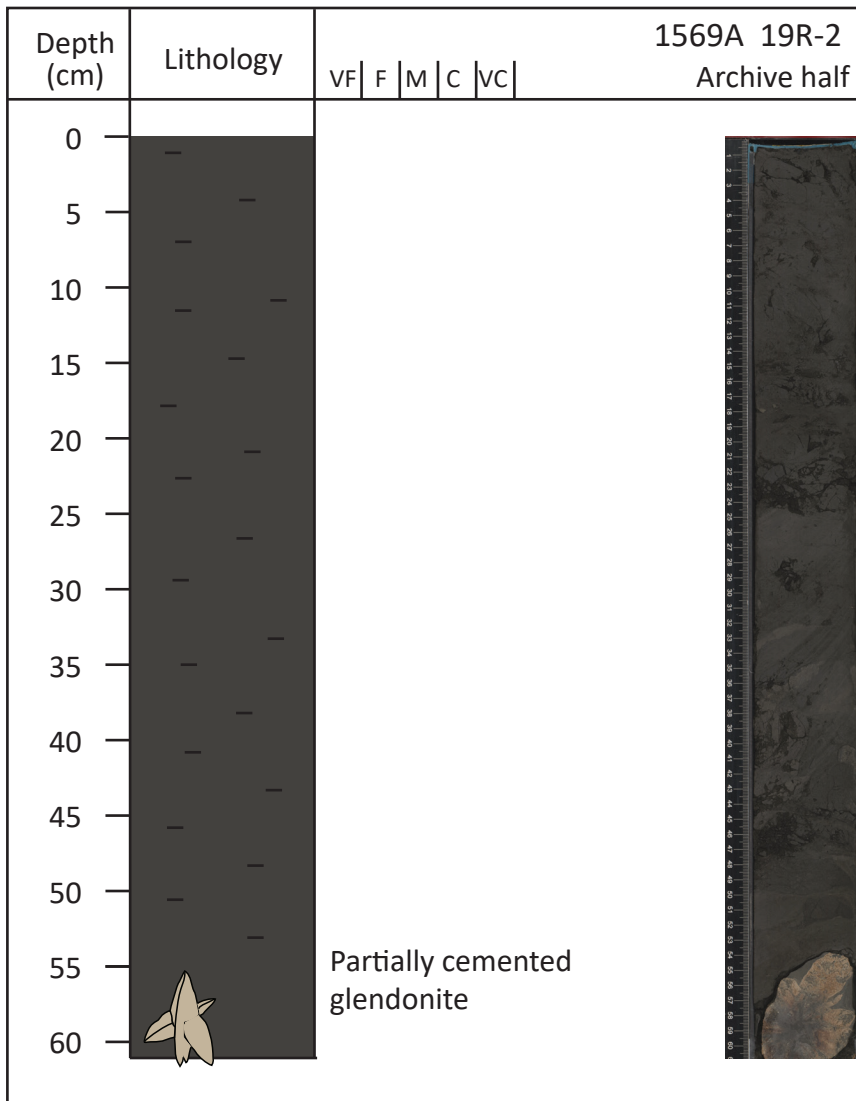

**Supplementary Figure**

**S5:** High-resolution log of core section U1569A-19R-2.

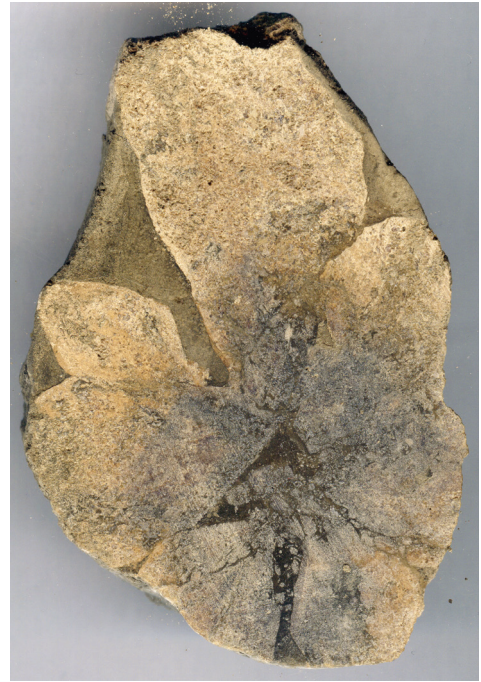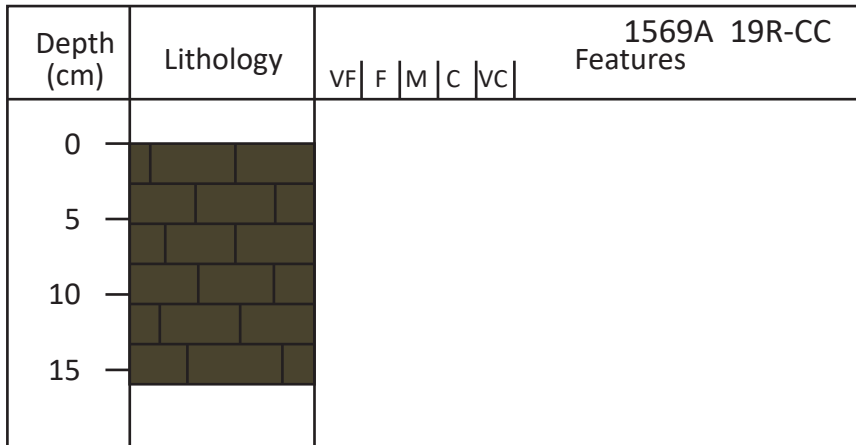

**(A1) Fig. A6:** High-resolution log of core section U1569A-19R-CC.

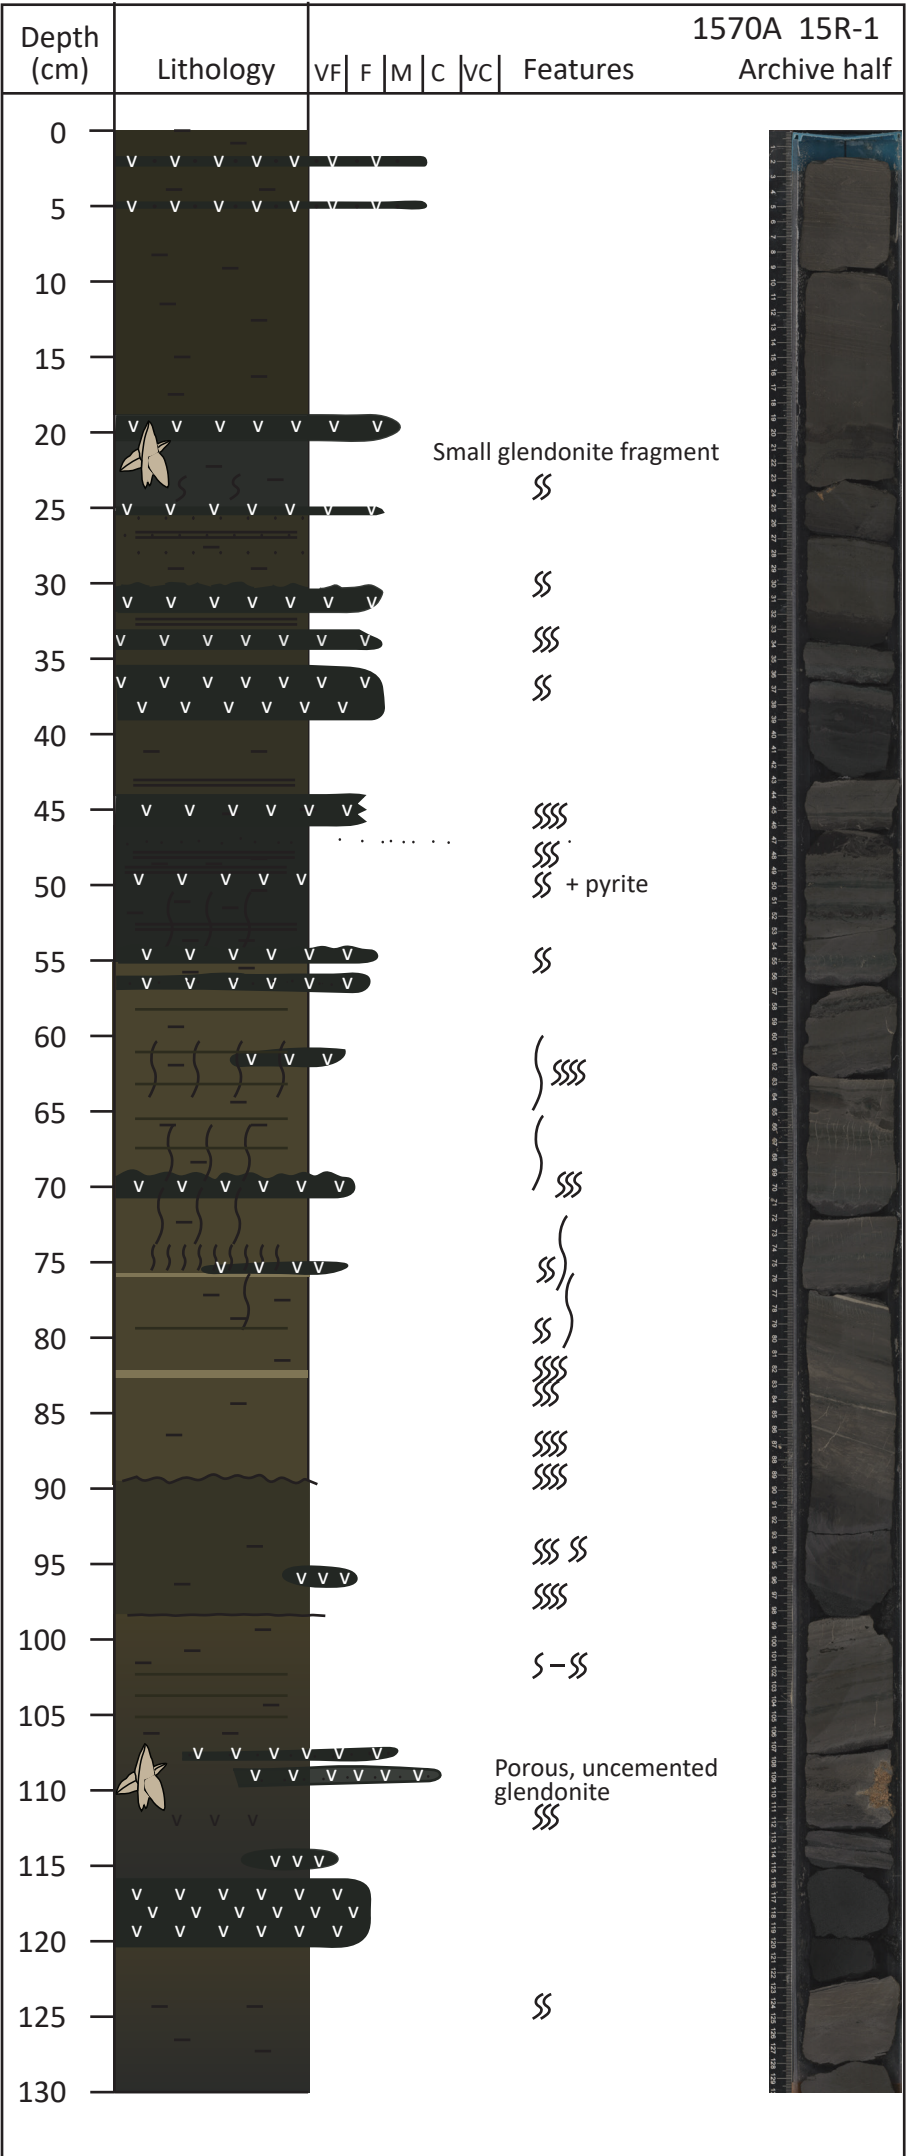

**Supplementary Figure S7:** High-resolution log of core section U1570A-15R-1.

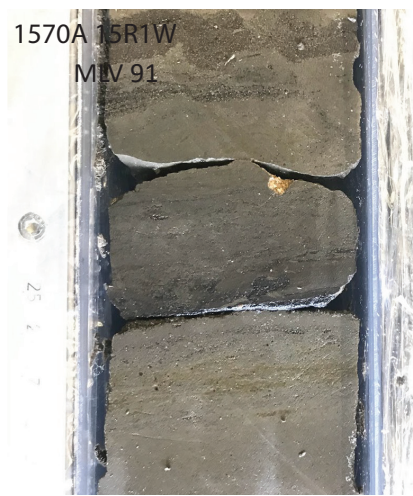

**KEY**

- Glendonite
- v v v Volcanic ash
- . . . . Sand-sized ash grains
- - - Mud/clay
- Carbonate
- Laminations
- Sub-laminations
- }} Bioturbation
- { "Water escape structures" / stress cracks

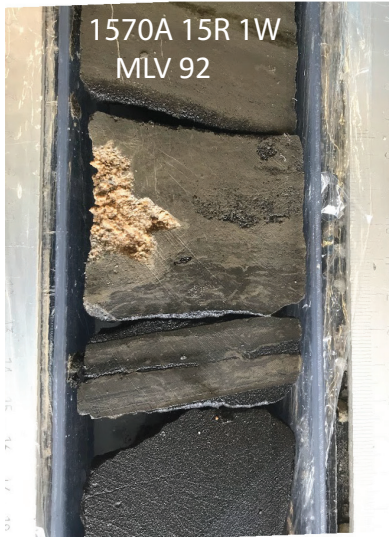

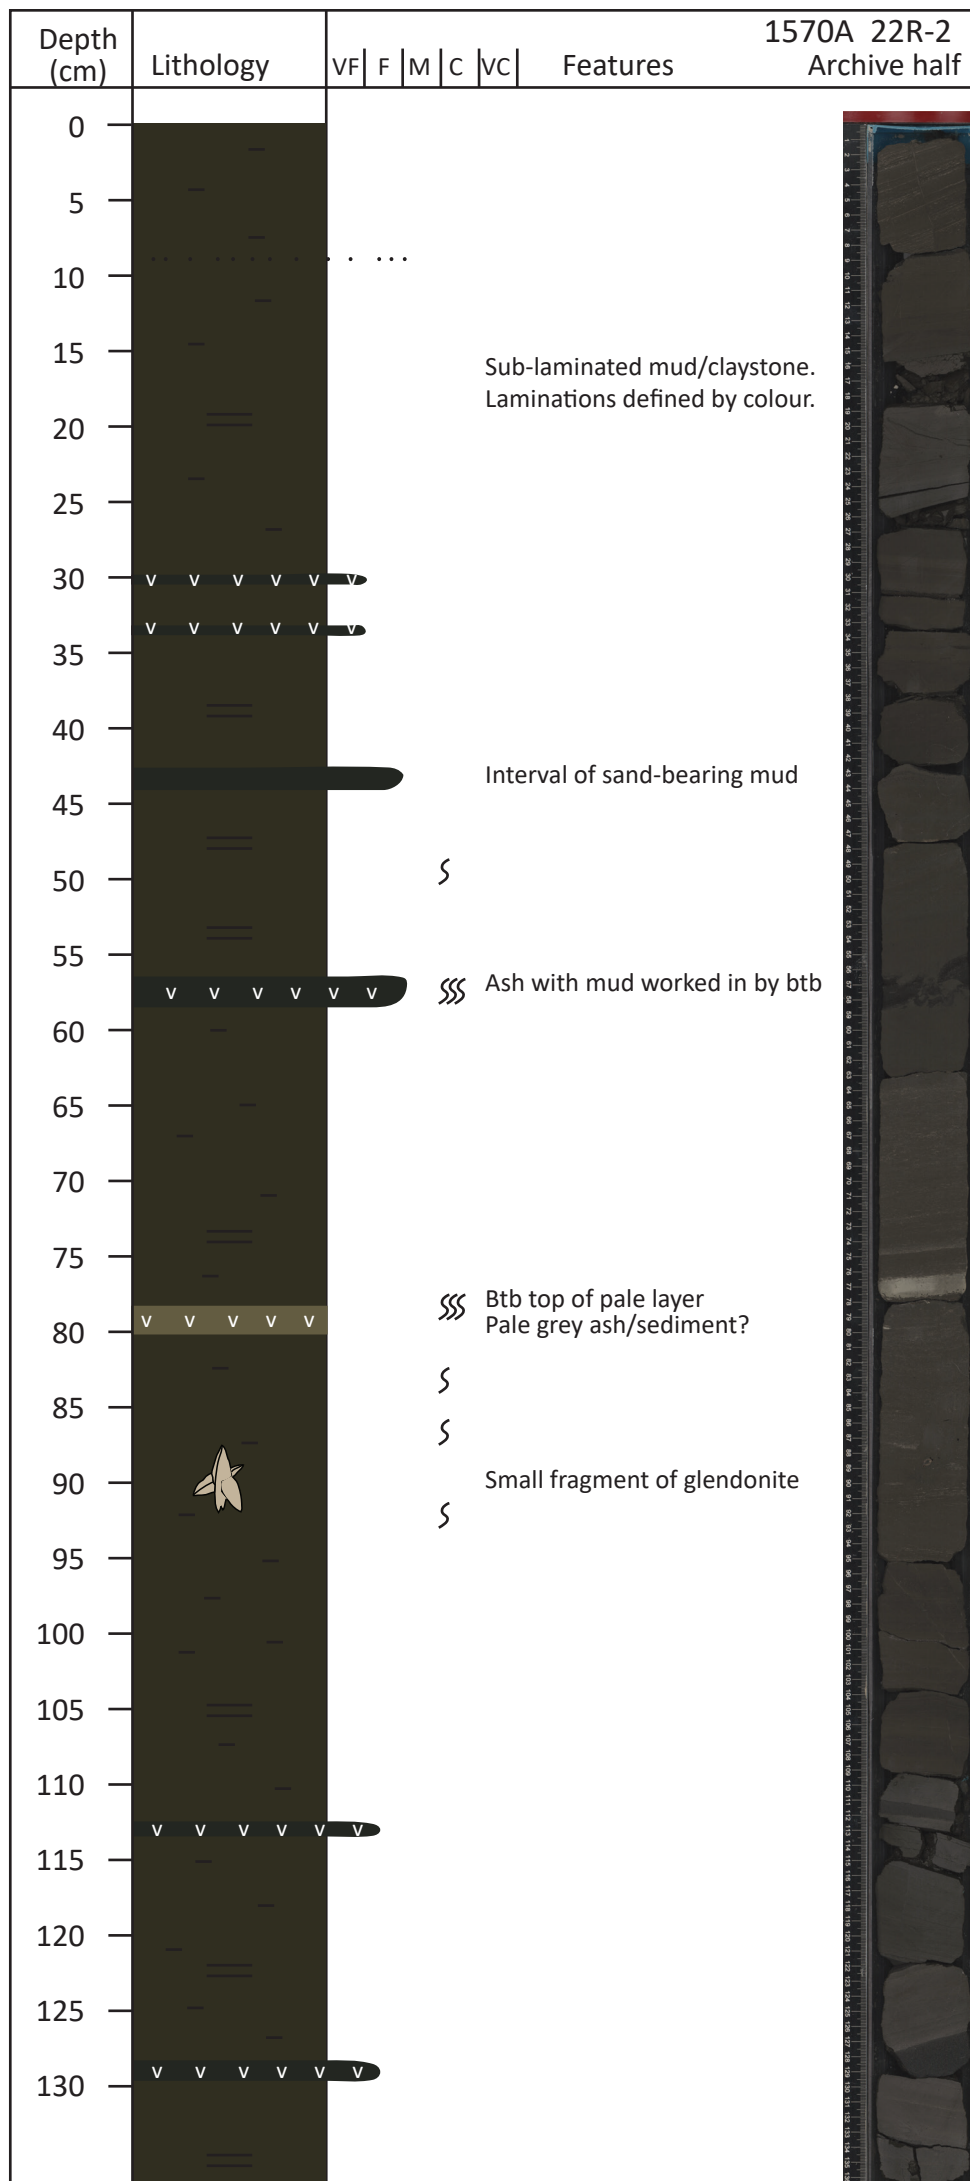

**Supplementary Figure S8:** High-resolution log of core section U1570A-22R-2.

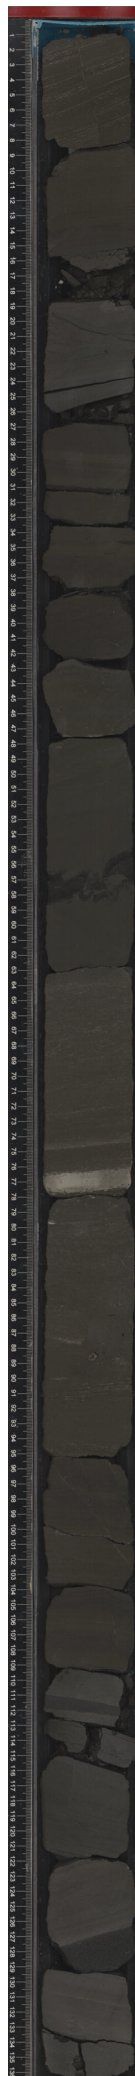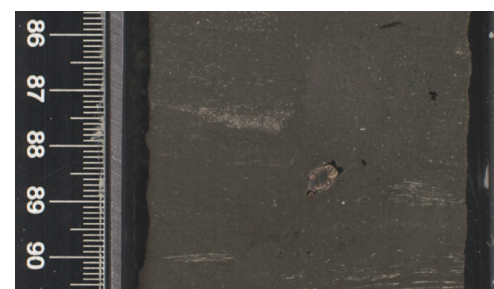



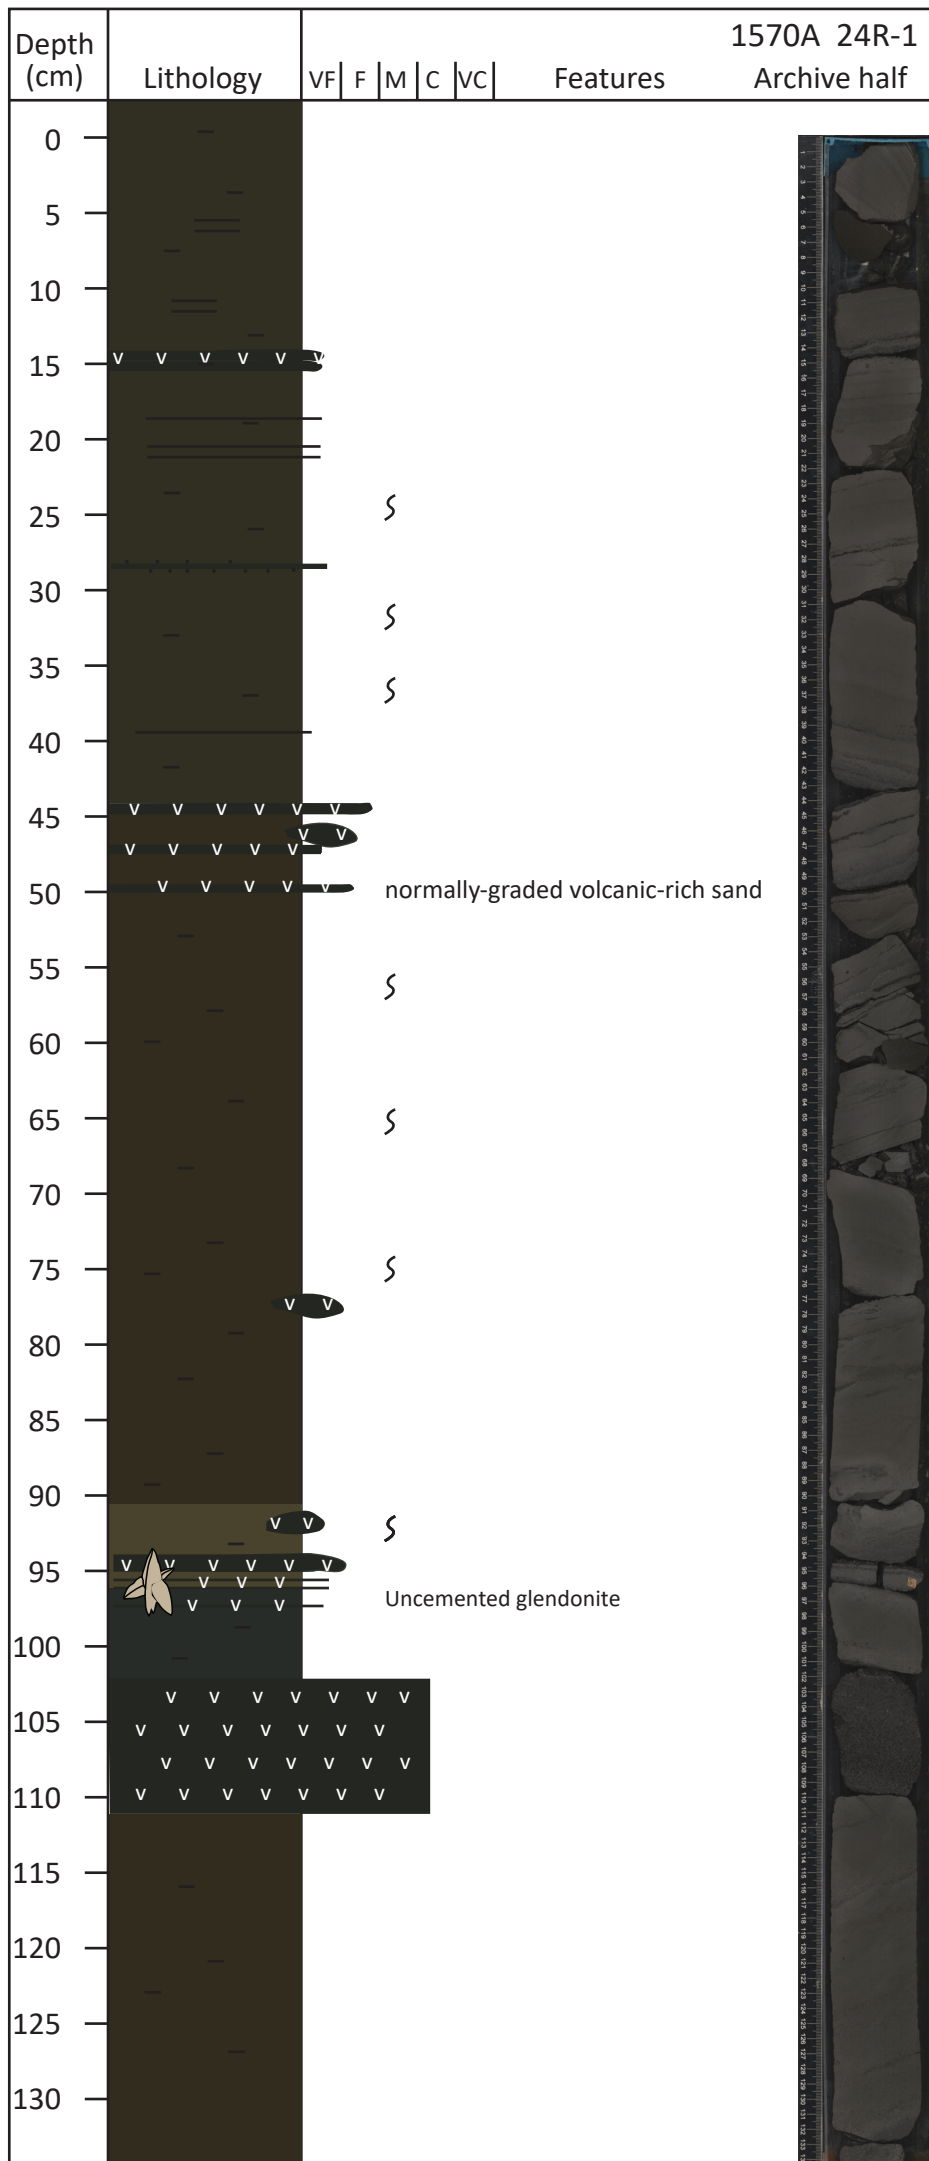

**Supplementary Figure S9: High-resolution log of core section U1570A-24R-1.**

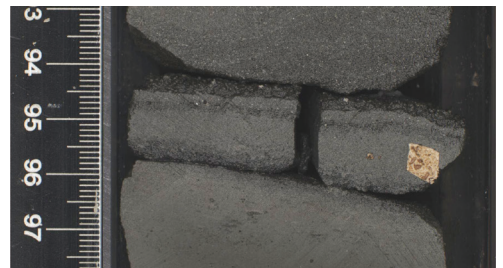

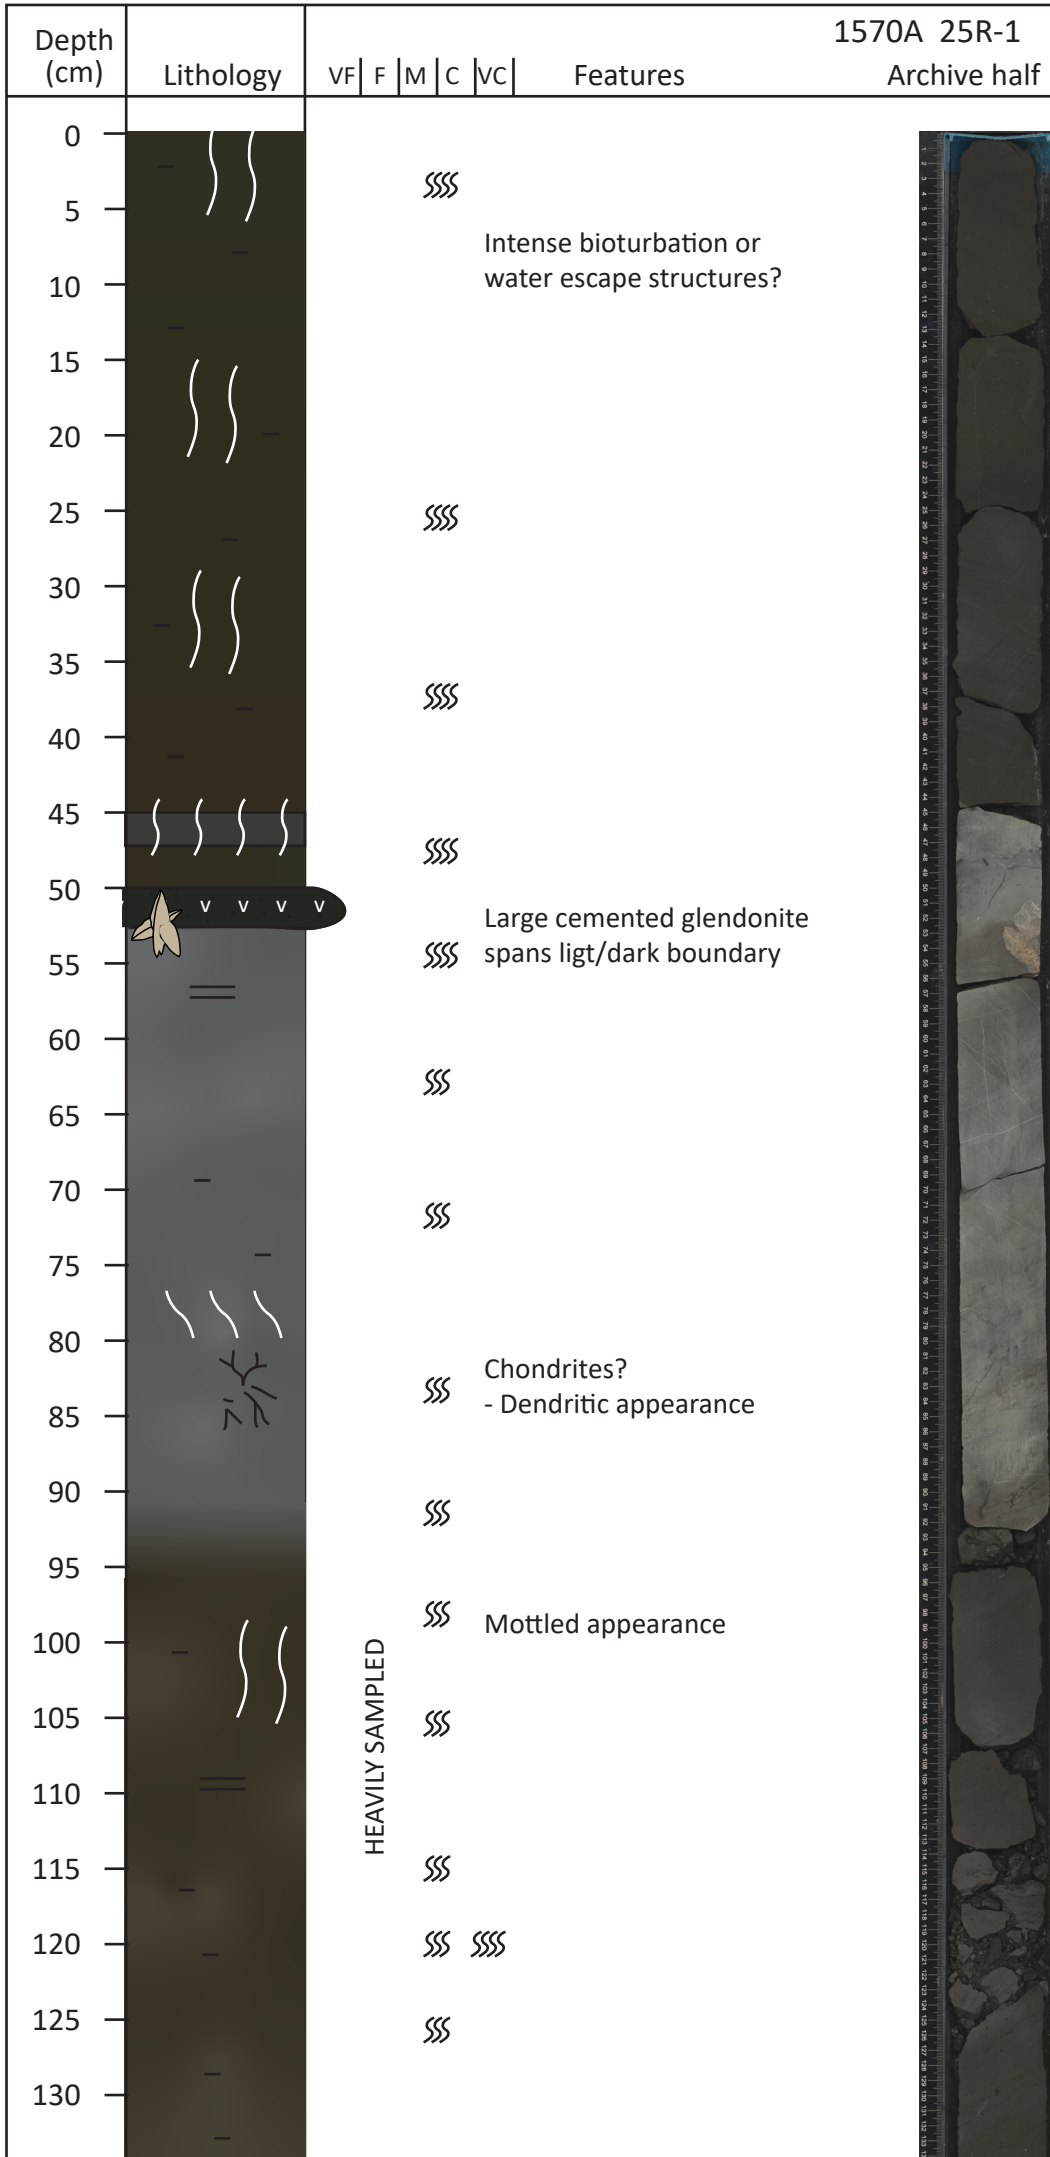

**Supplementary Figure S10: High-resolution log of core section U1570A-25R-1.**

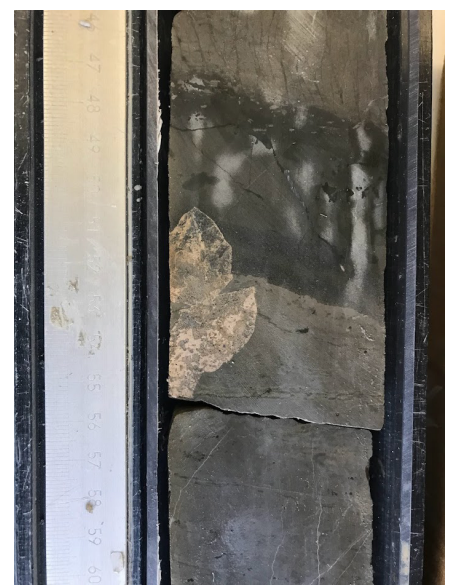

HEAVILY SAMPLED

**Supplementary Figure S11: Powder X-Ray diffraction patterns for powdered bulk glendonite samples**

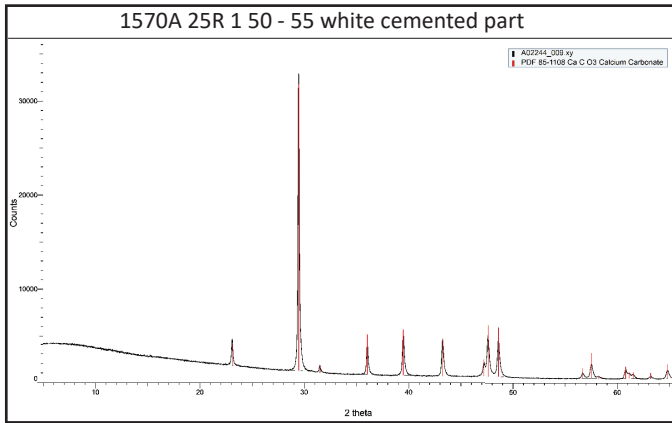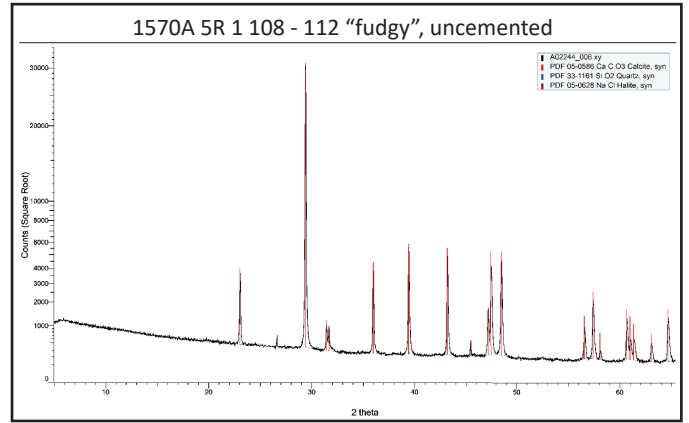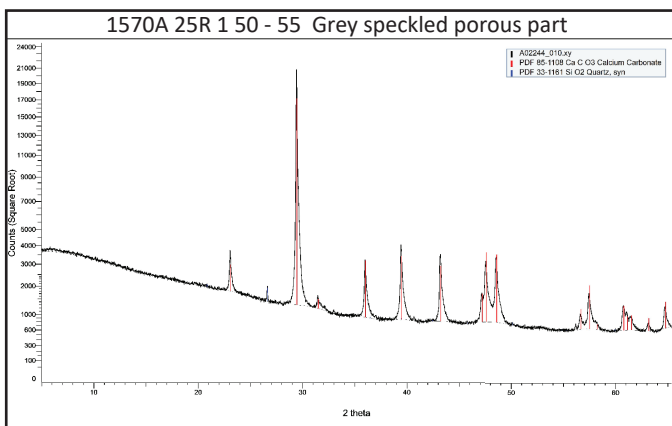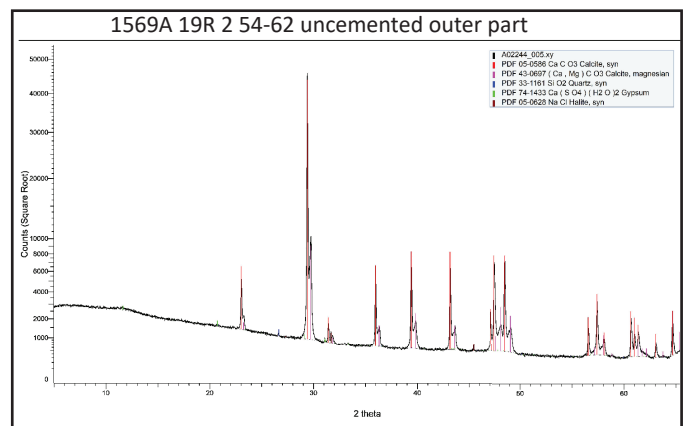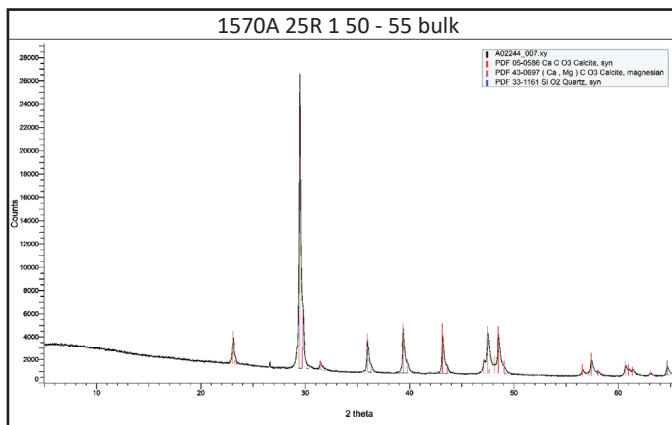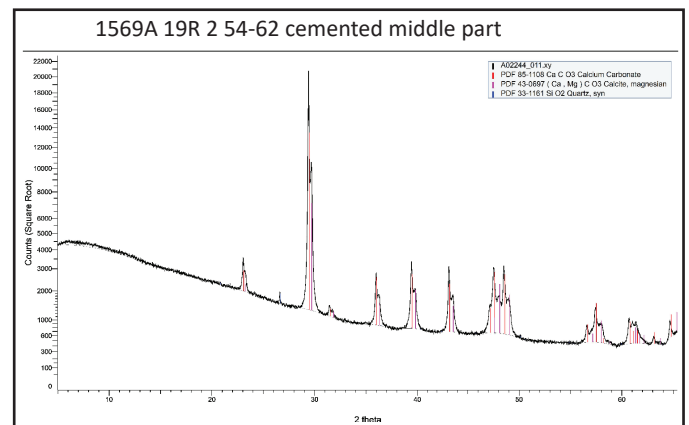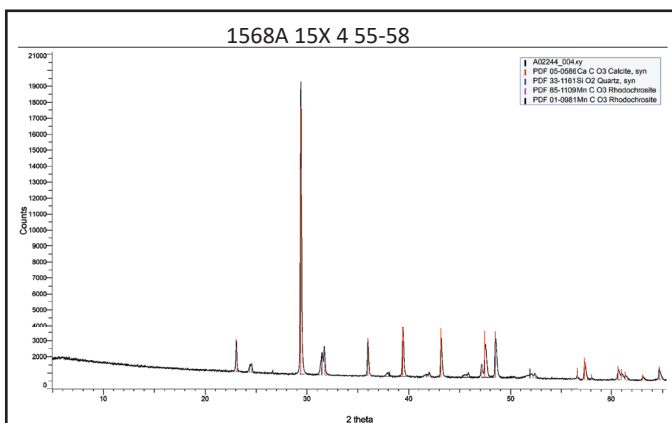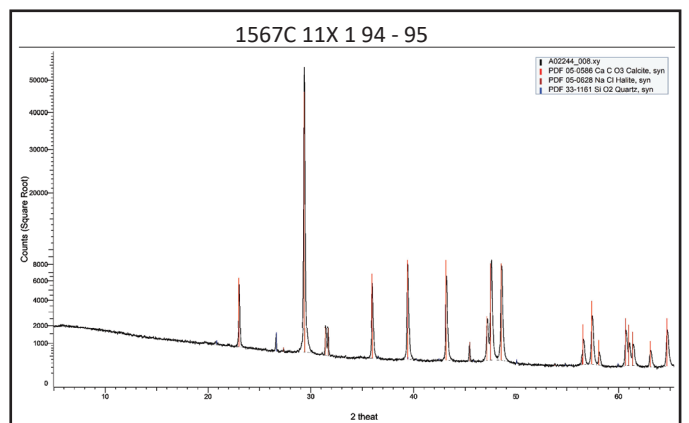

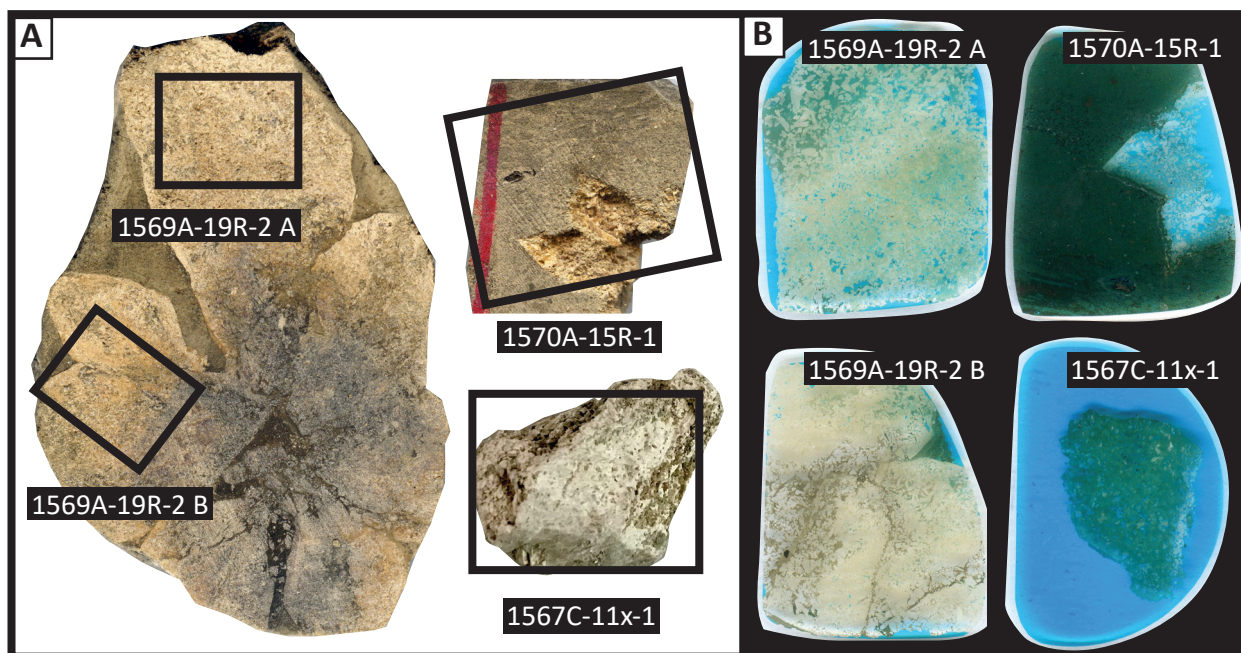

**Supplementary Figure S12: (A)** Overview of where thin sections were made from 3 selected glendonites. **(B)** Scans of the entire thin sections.

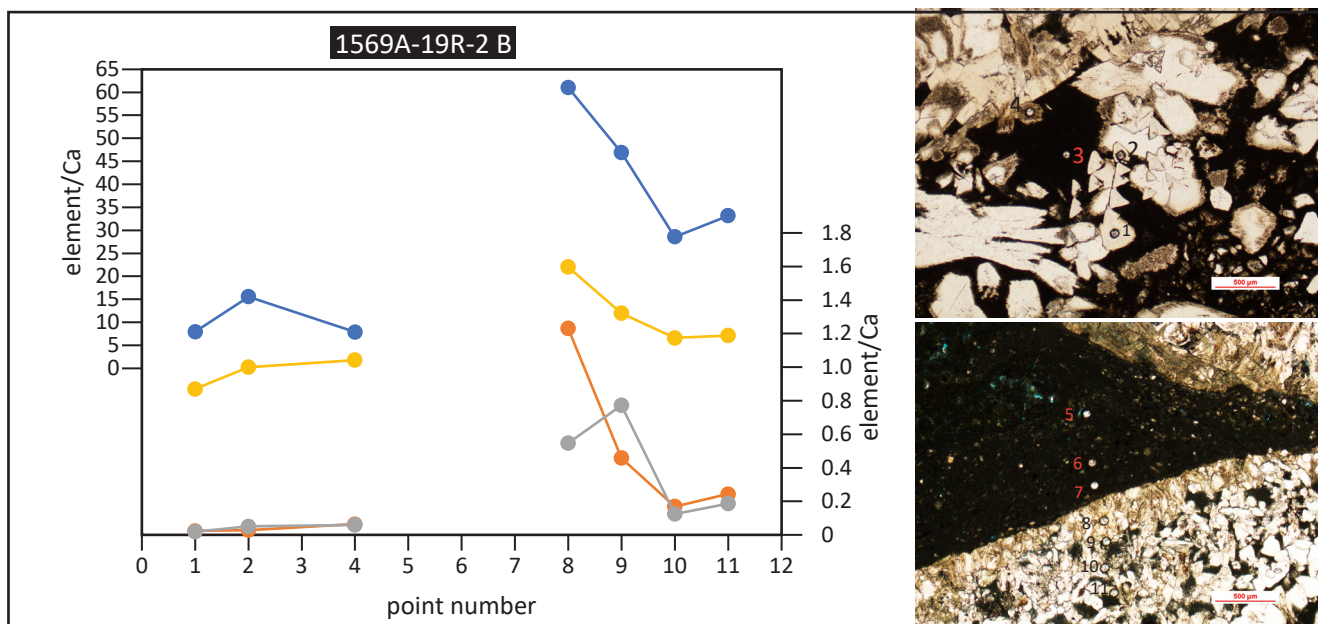

**Supplementary Figure S13: (Left)** Element/Ca profiles measured by LA-ICPMS across two areas of thin section B of the glendonite from U1569A-19R-2. **(Right)** Photomicrographs of the areas analysed, with labelled sample points, under plane polarised light.

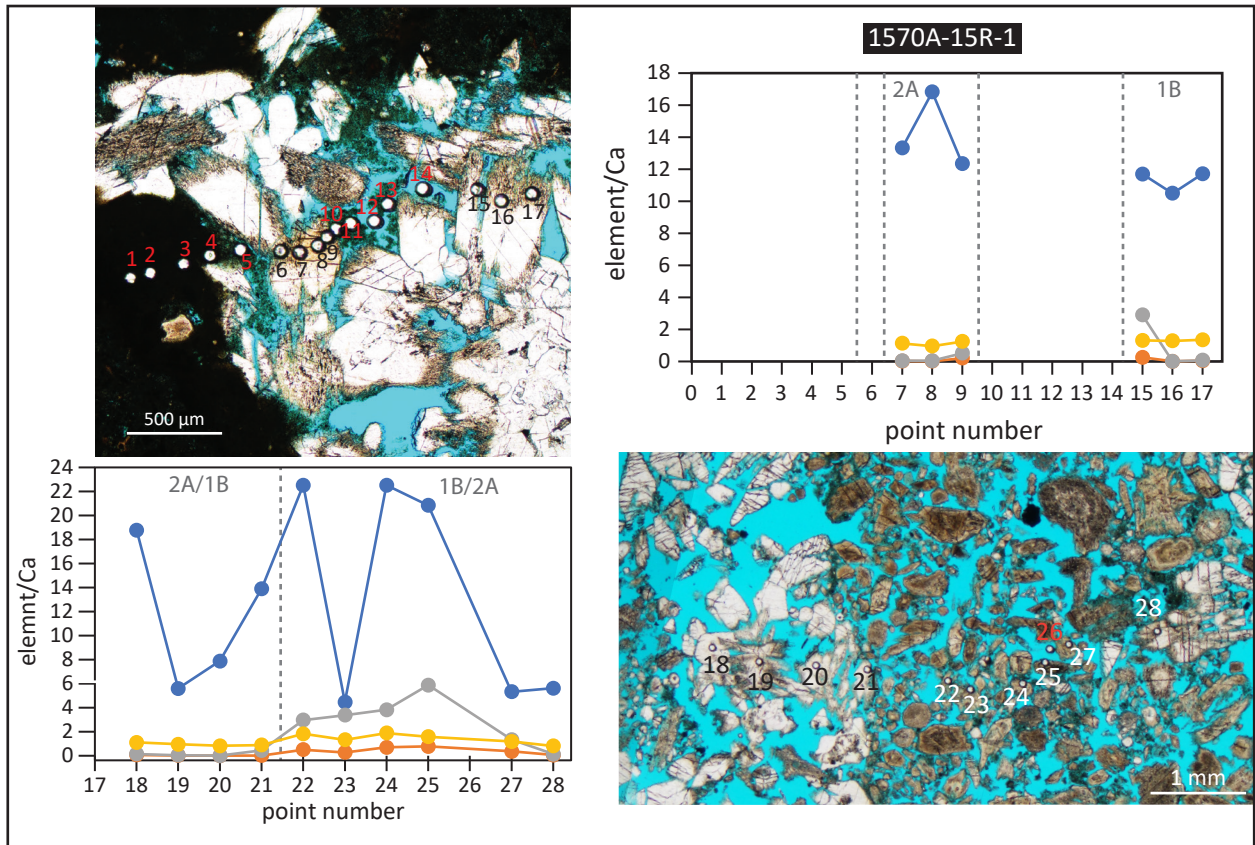

**Supplementary Figure S14:** Element/Ca profiles measured by LA-ICPMS across two areas of thin section of the glendonite from U1570A-15R-1, shown next to photomicrographs of the sections with labelled sample points, under plane polarised light.

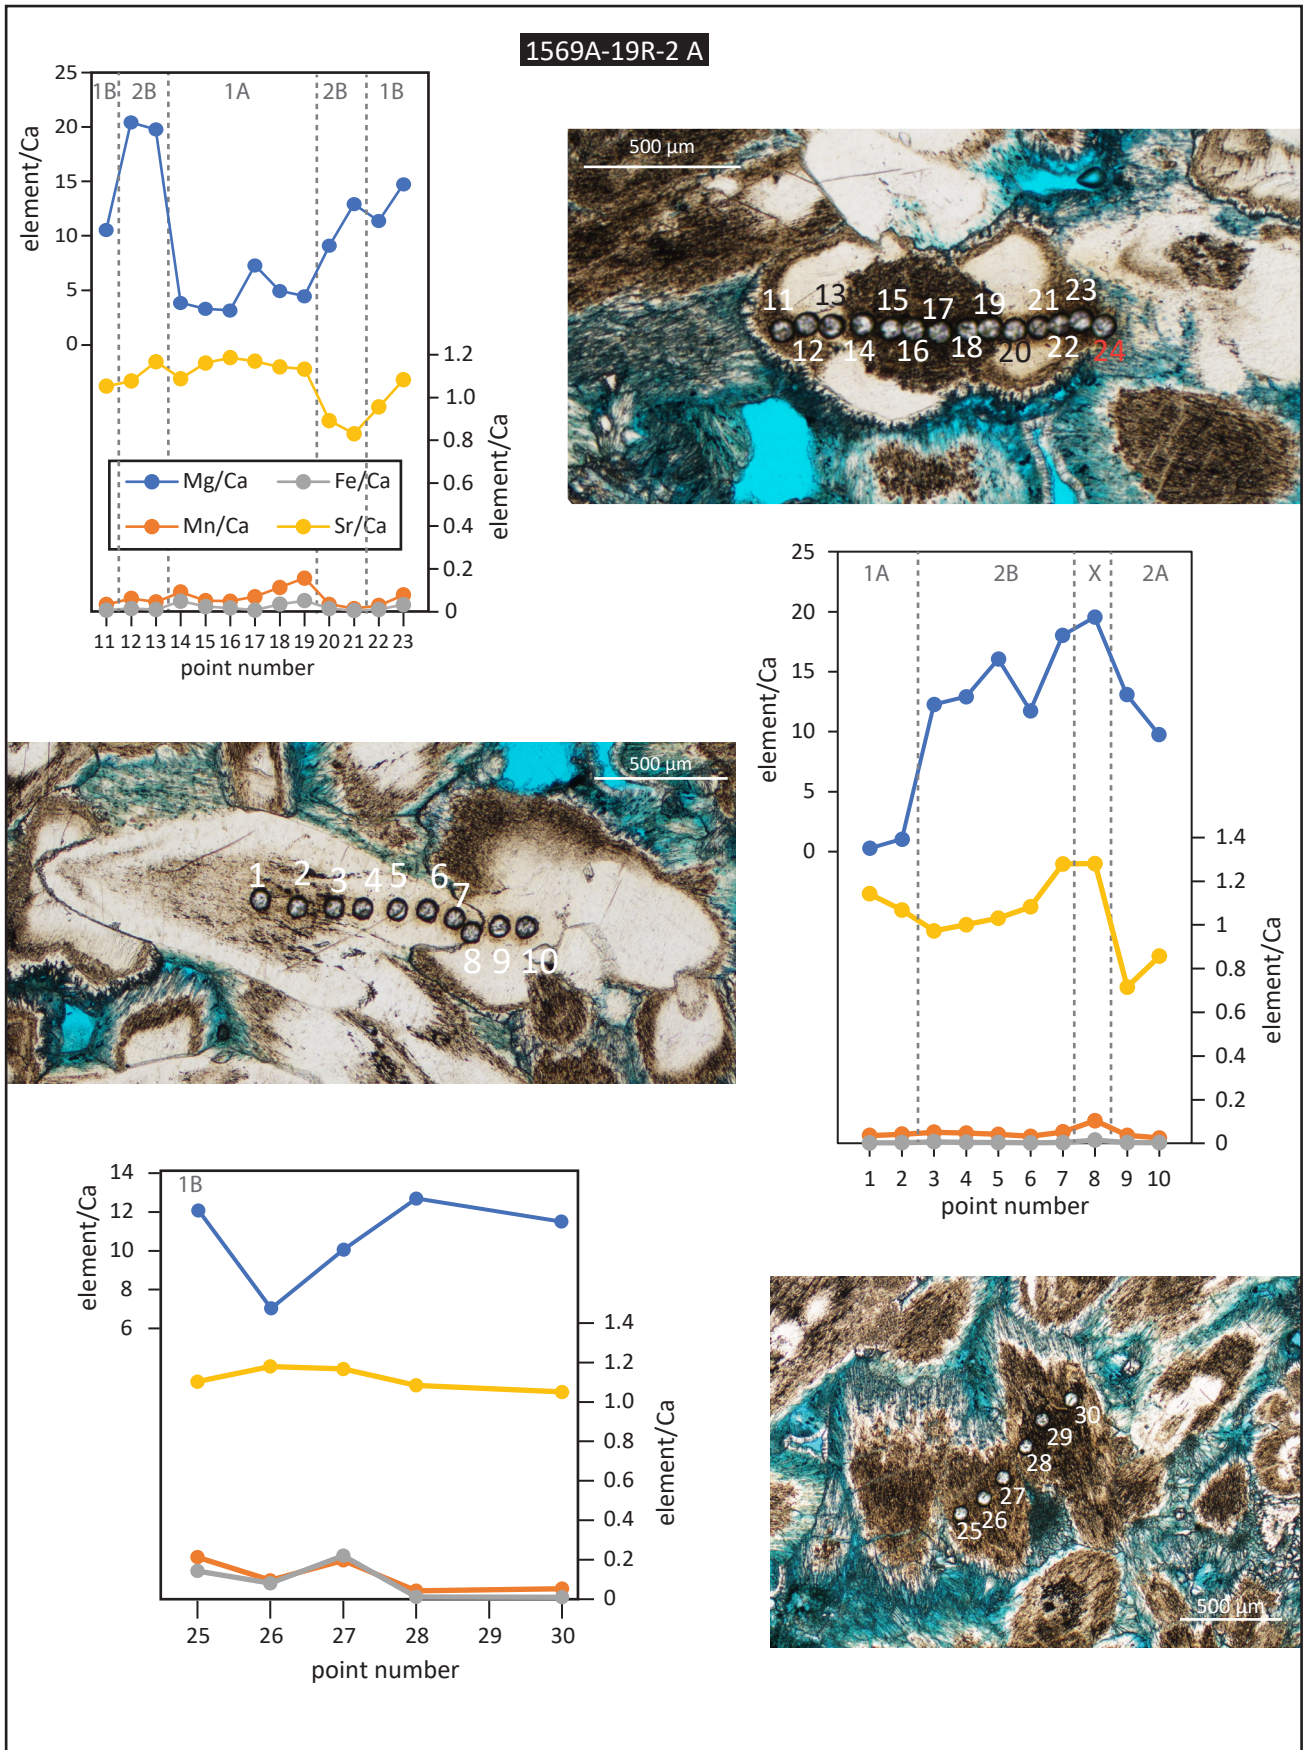

**Supplementary Figure S15:** Element/Ca profiles measured by LA-ICPMS across areas of thin section A of the glendonite from U1569A-19R-2, shown next to photomicrographs of the sections with labelled sample points, under plane polarised light.

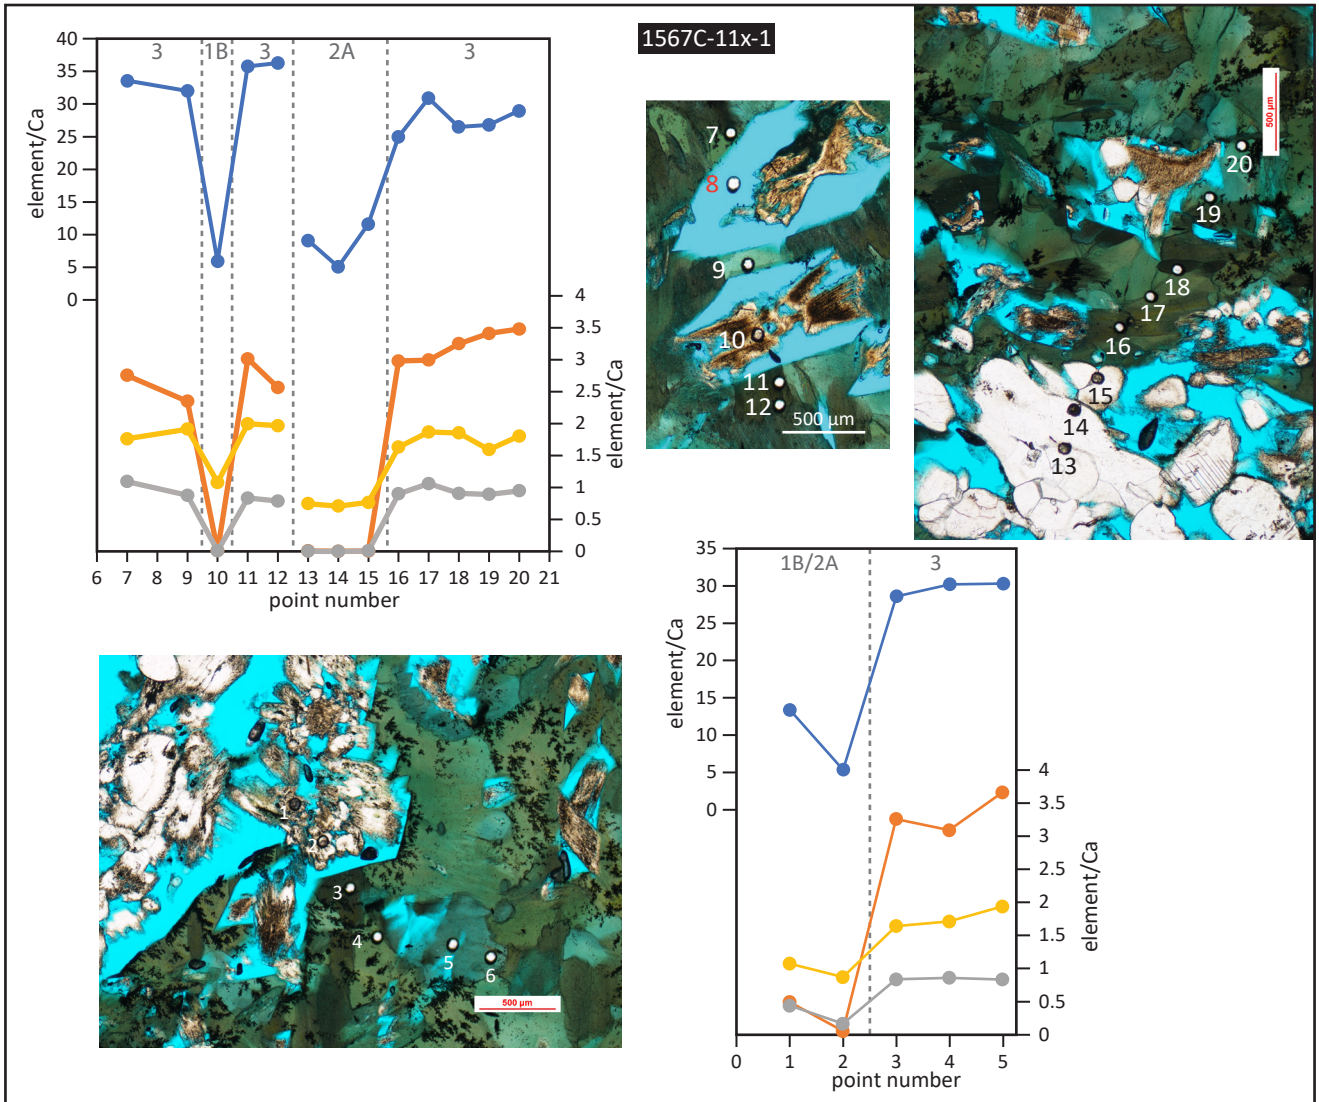

**Supplementary Figure S16:** Element/Ca profiles measured by LA-ICPMS across two areas of thin section of the glendonite from U1567C-11X-1, shown next to photomicrographs of the sections with labelled sample points, under plane polarised light.
